# Supplementary material
Source: PubMed Central journal article supplement (PMC4934679)
Supplement: NIHMS797456-supplement-Supplemental.pdf [file NIHMS797456-supplement-Supplemental.pdf]

## Supplementary Materials for

### **Skeletal muscle action of estrogen receptor $\alpha$ is critical for the maintenance of mitochondrial function and metabolic homeostasis in females**

Vicent Ribas, Brian G. Drew, Zhenqi Zhou, Jennifer Phun, Nareg Y. Kalajian, Teo Soleymani, Pedram Daraei, Kevin Widjaja, Jonathan Wanagat, Thomas Q. de Aguiar Vallim, Amy H. Fluitt, Steven Bensinger, Thuc Le, Caius Radu, Julian P. Whitelegge, Simon W. Beaven, Peter Tontonoz, Aldons J. Lusic, Brian W. Parks, Laurent Vergnes, Karen Reue, Harpreet Singh, Jean C. Bopassa, Ligia Toro, Enrico Stefani, Matthew J. Watt, Simon Schenk, Thorbjorn Akerstrom, Meghan Kelly, Bente K. Pedersen, Sylvia C. Hewitt, Kenneth S. Korach, Andrea L. Hevener\*

\*Corresponding author. E-mail: ahevener@mednet.ucla.edu

Published 13 April 2016, *Sci. Transl. Med.* **8**, 334ra54 (2016)  
DOI: 10.1126/scitranslmed.aad3815

#### **The PDF file includes:**

- Table S1. Basal metabolic characteristics in female subjects.
- Table S2. Animal characteristics after a 6-hour fast in the basal or clamped state.
- Table S3. Annotation of functionally enriched terms from Illumina microarray analyses on quadriceps muscle from female Control f/f versus MERKO mice.
- Table S4. Microarray analyses on quadriceps muscle from Control f/f versus MERKO mice.
- Table S5. Primer sequences for qPCR analyses on tissues and for genotyping of Control f/f and MERKO mice.
- Fig. S1. Real-time respirometry in C2C12 myotubes.
- Fig. S2. Muscle peak tension and time to fatigue.
- Fig. S3. Polg1 expression is regulated by ER $\alpha$  in muscle.
- Fig. S4. Altered mitochondrial fission-fusion signaling in ER $\alpha$ -deficient C2C12 myotubes.
- Fig. S5. Calcineurin-PKA-Rcan1 axis in C2C12 myotubes with Esr1-KD.
- Fig. S6. Expression of autophagy-related genes in MERKO muscle.
- Fig. S7. Autophagic flux studies in C2C12 myocytes with Esr1-KD.

**table S1. Basal metabolic characteristics in female subjects.** Age, body weight, fat mass, body mass index, and glucose and insulin concentrations in healthy women (Healthy Cohort n=18; n=9 premenopausal and n=9 postmenopausal) and women displaying clinical features of the metabolic syndrome (MetSyn, n=25; n=21 premenopausal and n=4 postmenopausal). The healthy cohort of women were stratified by menopausal status (n=9/group) and age, body weight, BMI, fat free mass, fasting blood glucose, fasting insulin, estradiol, FSH, and LH values are provided in the lower panel. Values are expressed as means  $\pm$  SD. Mean differences were detected by Student's t-test, and *P* values are provided for each comparison.

|                               | Healthy              | MetSyn                | <i>P</i> |
|-------------------------------|----------------------|-----------------------|----------|
| <i>n</i>                      | 18                   | 25                    |          |
| Age studied (yrs)             | 46 $\pm$ 5           | 45 $\pm$ 2            | 0.934    |
| Body weight (kg)              | 64 $\pm$ 2.0         | 89 $\pm$ 3.0          | <0.001   |
| Fat mass (kg)                 | 24 $\pm$ 1           | 40 $\pm$ 2            | <0.001   |
| BMI                           | 23 $\pm$ 1           | 33 $\pm$ 5            | <0.001   |
| Fasting blood glucose (mg/dl) | 87 $\pm$ 2           | 90 $\pm$ 2            | 0.371    |
| Fasting insulin (pmol/l)      | 41.6 $\pm$ 0.7       | 87.8 $\pm$ 7.9        | <0.001   |
| <br>                          |                      |                       |          |
| <i>Healthy Cohort</i>         | <i>Premenopausal</i> | <i>Postmenopausal</i> |          |
| <i>n</i>                      | 9                    | 9                     |          |
| Age studied (yrs)             | 23 $\pm$ 0.5         | 68 $\pm$ 0.7          | <0.001   |
| Body weight (kg)              | 64 $\pm$ 2.6         | 65 $\pm$ 2.7          | 0.71     |
| BMI                           | 22 $\pm$ 0.79        | 24 $\pm$ 0.90         | 0.16     |
| Fat free mass (kg)            | 40.6 $\pm$ 1.8       | 40.2 $\pm$ 0.87       | 0.84     |
| Fasting blood glucose (mg/dl) | 83 $\pm$ 3           | 94 $\pm$ 4            | 0.06     |
| Fasting insulin (pmol/l)      | 43 $\pm$ 6.5         | 30.4 $\pm$ 4.0        | 0.11     |
| Estradiol (pg/ml)             | 139 $\pm$ 40.5       | 14 $\pm$ 0.27         | 0.004    |
| FSH (IU/L)                    | 5.3 $\pm$ 0.51       | 68.9 $\pm$ 6.17       | <0.001   |
| LH (IU/L)                     | 8.6 $\pm$ 1.38       | 28.2 $\pm$ 2.9        | <0.001   |

**table S2. Animal characteristics following a 6-hour fast in the basal or clamped state.** Body weights and biochemical parameters are represented as mean  $\pm$  SEM,  $n=6-16$  female animals, per genotype (Control f/f vs. MERKO), normal chow (NC) fed. Mean differences were detected by one-way ANOVA or Student's t-test where appropriate, and exact  $P$  values are provided for each comparison

|                                            | Control f/f       | MERKO             | $P$   |
|--------------------------------------------|-------------------|-------------------|-------|
| $n$ basal                                  | 16                | 16                |       |
| $n$ clamp                                  | 7                 | 7                 |       |
| $n$ muscle glucose uptake                  | 6                 | 6                 |       |
| Age studied (wk)                           | 12-28             | 12-28             |       |
| <u>Circulating hormones and adipokines</u> |                   |                   |       |
| Fasting insulin (ng/ml), 12 weeks          | 0.22 $\pm$ 0.02   | 0.40 $\pm$ 0.03   | 0.01  |
| Adiponectin ( $\mu$ g/ml), 12 weeks        | 44 $\pm$ 1.4      | 29 $\pm$ 0.08     | 0.004 |
| Leptin (ng/ml), 12 weeks                   | 1.5 $\pm$ 0.3     | 3.0 $\pm$ 0.4     | 0.001 |
| <u>Body weight (g)</u>                     |                   |                   |       |
| Age 10-12 weeks                            | 21.3 $\pm$ 0.5    | 22.3 $\pm$ 0.7    | 0.286 |
| Age 24 weeks (muscle GU studies)           | 23.7 $\pm$ 0.4    | 26.2 $\pm$ 1.1    | 0.008 |
| Age 28 weeks (clamp studies)               | 24.4 $\pm$ 0.6    | 29.5 $\pm$ 1.4    | 0.004 |
| <u>Tissue weights (g) 28 weeks of age</u>  |                   |                   |       |
| Gonadal fat                                | 0.43 $\pm$ 0.08   | 1.08 $\pm$ 0.23   | 0.019 |
| Liver weight                               | 0.87 $\pm$ 0.02   | 0.98 $\pm$ 0.03   | 0.012 |
| Heart weight                               | 0.107 $\pm$ 0.004 | 0.114 $\pm$ 0.002 | 0.17  |
| <u>Clamp studies</u>                       |                   |                   |       |
| Fasting blood glucose (mg/dl)              | 124 $\pm$ 2       | 116 $\pm$ 2       | 0.07  |
| Clamp blood glucose (mg/dl)                | 114 $\pm$ 4       | 115 $\pm$ 2       | 0.77  |
| Clamp insulin (ng/ml)                      | 9 $\pm$ 2.5       | 11.8 $\pm$ 2      | 0.41  |
| Basal glucose turnover (mg/kg/min)         | 21 $\pm$ 2.1      | 26 $\pm$ 1.3      | 0.06  |
| GIR (mg/kg/min)                            | 57 $\pm$ 3.1      | 40 $\pm$ 3.0      | 0.001 |

**table S3. Annotation of functionally enriched terms from Illumina microarray analyses on quadriceps muscle from female Control f/f versus MERKO mice** (n=4-5 pooled samples of 3 muscles per genotype). Gene-functional annotation enrichment analysis to identify overrepresented biological terms associated with upregulated or downregulated genes in MERKO muscle microarray. Annotation categories from Gene Ontology Biological Process / Cellular Component, KEGG Pathways or Tissue\_UP were used to identify statistically significant enrichment using DAVID bioinformatics resources.

**Upregulated genes - Functional annotation enriched terms**

| <u>Gene Ontology - Biological Process</u>                        | <u>Count</u> | <u>%</u> | <u>Fold Enrichment</u> | <u>P-Value</u> |
|------------------------------------------------------------------|--------------|----------|------------------------|----------------|
| GO:0014706~striated muscle tissue development                    | 8            | 8.1      | 10.8                   | 8.16E-06       |
| GO:0060537~muscle tissue development                             | 8            | 8.1      | 10.2                   | 1.19E-05       |
| GO:0044057~regulation of system process                          | 9            | 9.1      | 7.7                    | 1.79E-05       |
| GO:0002026~regulation of the force of heart contraction          | 4            | 4.0      | 49.3                   | 6.14E-05       |
| GO:0007517~muscle organ development                              | 8            | 8.1      | 7.8                    | 6.50E-05       |
| GO:0006937~regulation of muscle contraction                      | 5            | 5.1      | 19.5                   | 1.13E-04       |
| GO:0043434~response to peptide hormone stimulus                  | 6            | 6.1      | 10.8                   | 2.15E-04       |
| GO:0009725~response to hormone stimulus                          | 7            | 7.1      | 7.3                    | 3.52E-04       |
| GO:0034097~response to cytokine stimulus                         | 4            | 4.0      | 23.7                   | 5.91E-04       |
| GO:0008203~cholesterol metabolic process                         | 5            | 5.1      | 12.5                   | 6.38E-04       |
| GO:0009719~response to endogenous stimulus                       | 7            | 7.1      | 6.5                    | 6.55E-04       |
| GO:0051336~regulation of hydrolase activity                      | 7            | 7.1      | 6.1                    | 9.05E-04       |
| GO:0016125~sterol metabolic process                              | 5            | 5.1      | 11.3                   | 9.45E-04       |
| GO:0051258~protein polymerization                                | 4            | 4.0      | 17.3                   | 1.50E-03       |
| GO:0055002~striated muscle cell development                      | 4            | 4.0      | 14.6                   | 2.48E-03       |
| GO:0008016~regulation of heart contraction                       | 4            | 4.0      | 13.3                   | 3.18E-03       |
| GO:0006869~lipid transport                                       | 5            | 5.1      | 7.8                    | 3.58E-03       |
| GO:0055001~muscle cell development                               | 4            | 4.0      | 12.6                   | 3.78E-03       |
| GO:0048738~cardiac muscle tissue development                     | 4            | 4.0      | 11.9                   | 4.45E-03       |
| GO:0010876~lipid localization                                    | 5            | 5.1      | 7.3                    | 4.69E-03       |
| GO:0042157~lipoprotein metabolic process                         | 4            | 4.0      | 9.9                    | 7.46E-03       |
| GO:0051346~negative regulation of hydrolase activity             | 3            | 3.0      | 21.8                   | 7.99E-03       |
| GO:0007519~skeletal muscle tissue development                    | 4            | 4.0      | 9.6                    | 8.11E-03       |
| GO:0060538~skeletal muscle organ development                     | 4            | 4.0      | 9.3                    | 8.80E-03       |
| GO:0006163~purine nucleotide metabolic process                   | 5            | 5.1      | 5.7                    | 1.11E-02       |
| GO:0051146~striated muscle cell differentiation                  | 4            | 4.0      | 8.1                    | 1.27E-02       |
| GO:0010927~cellular component assembly involved in morphogenesis | 3            | 3.0      | 16.6                   | 1.37E-02       |
| GO:0008202~steroid metabolic process                             | 5            | 5.1      | 5.3                    | 1.37E-02       |
| GO:0048747~muscle fiber development                              | 3            | 3.0      | 15.5                   | 1.55E-02       |
| GO:0006873~cellular ion homeostasis                              | 6            | 6.1      | 4.0                    | 1.61E-02       |

|                                                                  |   |     |      |          |
|------------------------------------------------------------------|---|-----|------|----------|
| GO:0048878~chemical homeostasis                                  | 7 | 7.1 | 3.4  | 1.64E-02 |
| GO:0055082~cellular chemical homeostasis                         | 6 | 6.1 | 3.9  | 1.75E-02 |
| GO:0043623~cellular protein complex assembly                     | 4 | 4.0 | 6.7  | 2.13E-02 |
| GO:0050801~ion homeostasis                                       | 6 | 6.1 | 3.6  | 2.43E-02 |
| GO:0030300~regulation of intestinal cholesterol absorption       | 2 | 2.0 | 80.1 | 2.44E-02 |
| GO:0010033~response to organic substance                         | 8 | 8.1 | 2.7  | 2.46E-02 |
| GO:0042692~muscle cell differentiation                           | 4 | 4.0 | 6.0  | 2.76E-02 |
| GO:0032371~regulation of sterol transport                        | 2 | 2.0 | 64.1 | 3.04E-02 |
| GO:0032374~regulation of cholesterol transport                   | 2 | 2.0 | 64.1 | 3.04E-02 |
| GO:0043462~regulation of ATPase activity                         | 2 | 2.0 | 64.1 | 3.04E-02 |
| GO:0019932~second-messenger-mediated signaling                   | 4 | 4.0 | 5.8  | 3.10E-02 |
| GO:0044093~positive regulation of molecular function             | 6 | 6.1 | 3.3  | 3.31E-02 |
| GO:0032368~regulation of lipid transport                         | 2 | 2.0 | 53.4 | 3.64E-02 |
| GO:0044058~regulation of digestive system process                | 2 | 2.0 | 53.4 | 3.64E-02 |
| GO:0006164~purine nucleotide biosynthetic process                | 4 | 4.0 | 5.3  | 3.86E-02 |
| GO:0030005~cellular di-, tri-valent inorganic cation homeostasis | 4 | 4.0 | 5.3  | 3.94E-02 |
| GO:0044092~negative regulation of molecular function             | 4 | 4.0 | 5.1  | 4.18E-02 |
| GO:0042592~homeostatic process                                   | 8 | 8.1 | 2.4  | 4.35E-02 |
| GO:0019725~cellular homeostasis                                  | 6 | 6.1 | 3.1  | 4.41E-02 |
| GO:0006936~muscle contraction                                    | 3 | 3.0 | 8.6  | 4.66E-02 |
| GO:0045214~sarcomere organization                                | 2 | 2.0 | 40.0 | 4.83E-02 |
| GO:0055066~di-, tri-valent inorganic cation homeostasis          | 4 | 4.0 | 4.8  | 4.88E-02 |

### **Gene Ontology - Cell Component**

|                                              |    |      |      |          |
|----------------------------------------------|----|------|------|----------|
| GO:0032994~protein-lipid complex             | 5  | 5.1  | 26.9 | 3.09E-05 |
| GO:0034358~plasma lipoprotein particle       | 5  | 5.1  | 26.9 | 3.09E-05 |
| GO:0030017~sarcomere                         | 6  | 6.1  | 12.3 | 1.17E-04 |
| GO:0044449~contractile fiber part            | 6  | 6.1  | 11.3 | 1.72E-04 |
| GO:0030016~myofibril                         | 6  | 6.1  | 10.7 | 2.19E-04 |
| GO:0043292~contractile fiber                 | 6  | 6.1  | 10.2 | 2.74E-04 |
| GO:0005576~extracellular region              | 23 | 23.2 | 2.2  | 3.69E-04 |
| GO:0005615~extracellular space               | 11 | 11.1 | 3.4  | 1.12E-03 |
| GO:0034364~high-density lipoprotein particle | 3  | 3.0  | 27.2 | 5.16E-03 |
| GO:0044421~extracellular region part         | 12 | 12.1 | 2.5  | 7.93E-03 |
| GO:0005759~mitochondrial matrix              | 5  | 5.1  | 4.8  | 1.99E-02 |
| GO:0031980~mitochondrial lumen               | 5  | 5.1  | 4.8  | 1.99E-02 |
| GO:0005856~cytoskeleton                      | 13 | 13.1 | 2.0  | 2.88E-02 |
| GO:0015629~actin cytoskeleton                | 5  | 5.1  | 4.2  | 3.07E-02 |
| GO:0031674~I band                            | 3  | 3.0  | 9.3  | 4.06E-02 |
| GO:0044429~mitochondrial part                | 8  | 8.1  | 2.4  | 4.56E-02 |

|                                                    |    |      |      |          |
|----------------------------------------------------|----|------|------|----------|
| GO:0005863~striated muscle thick filament          | 2  | 2.0  | 41.4 | 4.67E-02 |
| <b><u>KEGG Pathway</u></b>                         |    |      |      |          |
| mmu05414:Dilated cardiomyopathy                    | 8  | 8.1  | 12.2 | 2.51E-06 |
| mmu04260:Cardiac muscle contraction                | 6  | 6.1  | 11.2 | 1.50E-04 |
| mmu04610:Complement and coagulation cascades       | 6  | 6.1  | 10.2 | 2.41E-04 |
| mmu05410:Hypertrophic cardiomyopathy (HCM)         | 6  | 6.1  | 9.9  | 2.73E-04 |
| mmu04540:Gap junction                              | 5  | 5.1  | 7.9  | 3.11E-03 |
| mmu03320:PPAR signaling pathway                    | 4  | 4.0  | 6.7  | 2.01E-02 |
| mmu04020:Calcium signaling pathway                 | 5  | 5.1  | 3.8  | 3.68E-02 |
| mmu04960:Aldosterone-regulated sodium reabsorption | 3  | 3.0  | 9.4  | 3.83E-02 |
| <b><u>Tissue Specific expression</u></b>           |    |      |      |          |
| Plasma                                             | 11 | 11.1 | 22.1 | 5.68E-11 |
| Liver                                              | 46 | 46.5 | 2.5  | 7.09E-10 |
| Skeletal muscle                                    | 7  | 7.1  | 7.5  | 3.31E-04 |
| Heart                                              | 14 | 14.1 | 2.8  | 1.14E-03 |

#### Downregulated genes - Functional annotation enriched terms

| <b><u>Gene Ontology - Biological Process</u></b> | <b><u>Count</u></b> | <b><u>%</u></b> | <b><u>Fold Enrichment</u></b> | <b><u>PValue</u></b> |
|--------------------------------------------------|---------------------|-----------------|-------------------------------|----------------------|
| GO:0019318~hexose metabolic process              | 4                   | 6.5             | 9.2                           | 8.45E-03             |
| GO:0005996~monosaccharide metabolic process      | 4                   | 6.5             | 8.2                           | 1.17E-02             |
| GO:0034613~cellular protein localization         | 4                   | 6.5             | 5.1                           | 4.03E-02             |
| GO:0070727~cellular macromolecule localization   | 4                   | 6.5             | 5.0                           | 4.10E-02             |
| GO:0006605~protein targeting                     | 3                   | 4.8             | 8.4                           | 4.65E-02             |
| GO:0006006~glucose metabolic process             | 3                   | 4.8             | 8.4                           | 4.72E-02             |
| <b><u>Gene Ontology - Cell Component</u></b>     |                     |                 |                               |                      |
| GO:0070013~intracellular organelle lumen         | 9                   | 14.5            | 2.2                           | 4.67E-02             |
| GO:0043233~organelle lumen                       | 9                   | 14.5            | 2.2                           | 4.74E-02             |
| <b><u>Tissue Specific expression</u></b>         |                     |                 |                               |                      |
| Macrophage                                       | 8                   | 12.9            | 4.0                           | 3.35E-03             |

**table S4. Microarray analyses on quadriceps muscle from Control f/f versus MERKO mice.** Significant differences in gene expression between genotypes are indicated within a 5% false discovery rate.

Gene expression reduced by muscle ER $\alpha$  deletion compared with Control f/f

| PROBE_ID     | SYMBOL               | logFC        | AveExpr     | t (fold change f/fvMERKO) | P.Value     | adj.P.Val   | B (log odds of difference) |
|--------------|----------------------|--------------|-------------|---------------------------|-------------|-------------|----------------------------|
| ILMN_2726412 | <b>Esr1</b>          | -2.277655474 | 6.473039909 | <b>-15.6036705</b>        | 3.94E-08    | 0.000354148 | 8.444042165                |
| ILMN_1234415 | <b>Prima1</b>        | -0.985307272 | 5.922511303 | <b>-8.6208823</b>         | 8.07E-06    | 0.004137207 | 4.138486255                |
| ILMN_2783833 | <b>Gm1157</b>        | -3.085046066 | 10.25763503 | <b>-8.195526888</b>       | 1.24E-05    | 0.00573454  | 3.742885352                |
| ILMN_2895511 | <b>Kcng4</b>         | -0.916773398 | 8.820014735 | <b>-7.474888938</b>       | 2.69E-05    | 0.009552424 | 3.022823108                |
| ILMN_2698004 | <b>Gck</b>           | -1.82891154  | 6.262887545 | <b>-7.388021686</b>       | 2.96E-05    | 0.009954142 | 2.931550936                |
| ILMN_2746870 | <b>Nog</b>           | -0.69628891  | 5.575008116 | <b>-7.126006382</b>       | 3.99E-05    | 0.012596914 | 2.650141775                |
| ILMN_2739544 | <b>Stc2</b>          | -1.342463315 | 7.027091096 | <b>-7.097193346</b>       | 4.13E-05    | 0.012691305 | 2.618627264                |
| ILMN_2712668 | <b>C230090D14</b>    | -0.509987365 | 11.73148254 | <b>-7.054088439</b>       | 4.34E-05    | 0.012835171 | 2.571267566                |
| ILMN_1230396 | <b>Zc3hdc6</b>       | -0.716443785 | 8.259988453 | <b>-7.020872651</b>       | 4.51E-05    | 0.012835171 | 2.534597927                |
| ILMN_2760468 | <b>C230090D14</b>    | -0.771836037 | 6.362214562 | <b>-6.596580615</b>       | 7.45E-05    | 0.016923645 | 2.052505123                |
| ILMN_1225229 | <b>Slc35e4</b>       | -0.774234383 | 6.757787034 | <b>-6.596411795</b>       | 7.46E-05    | 0.016923645 | 2.052308167                |
| ILMN_2679711 | <b>Rabl4</b>         | -0.667237744 | 9.322547575 | <b>-6.519299525</b>       | 8.19E-05    | 0.01799905  | 1.961908427                |
| ILMN_2803334 | <b>Alg2</b>          | -0.631338924 | 8.024634736 | <b>-6.499574137</b>       | 8.39E-05    | 0.018150562 | 1.93864412                 |
| ILMN_2441534 | <b>Tsga2</b>         | -1.30528737  | 7.577639006 | <b>-6.368360398</b>       | 9.86E-05    | 0.020082437 | 1.782426861                |
| ILMN_2863362 | <b>Mme</b>           | -0.651761031 | 6.078654478 | <b>-6.318288424</b>       | 0.000104977 | 0.021063814 | 1.722138623                |
| ILMN_2658208 | <b>Setd8</b>         | -0.629431679 | 9.757696505 | <b>-6.277640071</b>       | 0.00011045  | 0.021599321 | 1.67292066                 |
| ILMN_2603825 | <b>Setd8</b>         | -0.649898125 | 9.512540067 | <b>-6.127307171</b>       | 0.000133536 | 0.023965408 | 1.488729066                |
| ILMN_2698449 | <b>Dtr</b>           | -0.607784637 | 9.035870069 | <b>-6.040200797</b>       | 0.000149264 | 0.026158932 | 1.380432058                |
| ILMN_1248959 | <b>Tinag</b>         | -0.993880079 | 6.140244205 | <b>-5.980790646</b>       | 0.000161133 | 0.027680702 | 1.305902065                |
| ILMN_2881296 | <b>Tmem66</b>        | -1.071256243 | 11.00779167 | <b>-5.948800929</b>       | 0.000167944 | 0.027680702 | 1.265545954                |
| ILMN_2755443 | <b>Sh3kbp1</b>       | -0.537838853 | 9.99593112  | <b>-5.936257875</b>       | 0.000170698 | 0.027803724 | 1.249679369                |
| ILMN_2667091 | <b>Ppp1r3c</b>       | -0.901458163 | 14.03156243 | <b>-5.860796388</b>       | 0.000188335 | 0.029630651 | 1.153709067                |
| ILMN_3001076 | <b>Setd8</b>         | -0.525905614 | 10.33957584 | <b>-5.809672685</b>       | 0.000201396 | 0.031329543 | 1.088188836                |
| ILMN_1258578 | <b>2310047C17Rik</b> | -0.454848465 | 11.14861774 | <b>-5.679750943</b>       | 0.000239196 | 0.034859609 | 0.919846243                |
| ILMN_1232195 | <b>1110028E10Rik</b> | -0.412139153 | 8.524987459 | <b>-5.643614717</b>       | 0.000251021 | 0.036201937 | 0.872553859                |
| ILMN_1217723 | <b>Stau2</b>         | -0.488043202 | 9.579105896 | <b>-5.634241208</b>       | 0.00025419  | 0.036281081 | 0.86025302                 |
| ILMN_2922560 | <b>Slc16a9</b>       | -0.588108227 | 7.261534577 | <b>-5.570052793</b>       | 0.000277086 | 0.037786705 | 0.77564736                 |
| ILMN_1238640 | <b>2310003H01Rik</b> | -0.590767006 | 9.060650926 | <b>-5.514334487</b>       | 0.000298765 | 0.039022712 | 0.70167979                 |
| ILMN_3161419 | <b>LOC627585</b>     | -0.480763801 | 5.285061196 | <b>-5.466431405</b>       | 0.000318866 | 0.039772059 | 0.637695467                |
| ILMN_2613908 | <b>Alox12</b>        | -0.622291271 | 5.913561455 | <b>-5.418274376</b>       | 0.000340547 | 0.041358534 | 0.573006443                |
| ILMN_2966162 | <b>Tmem56</b>        | -0.50897192  | 10.60424426 | <b>-5.411029545</b>       | 0.000343944 | 0.041407823 | 0.563242772                |
| ILMN_2881019 | <b>Sh3kbp1</b>       | -0.501277423 | 10.30154117 | <b>-5.325876559</b>       | 0.000386714 | 0.04499208  | 0.44786174                 |
| ILMN_2874084 | <b>Car9</b>          | -0.68628721  | 5.721217354 | <b>-5.272718561</b>       | 0.000416288 | 0.047608333 | 0.375251436                |
| ILMN_1220617 | <b>Hr</b>            | -0.952222415 | 8.056302289 | <b>-5.239345824</b>       | 0.000436089 | 0.049086551 | 0.329437863                |

Gene expression elevated by muscle ER $\alpha$  deletion compared with Control f/f

|              |                      |             |             |             |             |             |             |
|--------------|----------------------|-------------|-------------|-------------|-------------|-------------|-------------|
| ILMN_2852925 | <b>Higd1b</b>        | 0.598853741 | 6.741874467 | 5.230483931 | 0.000441515 | 0.049296548 | 0.317242766 |
| ILMN_2780760 | <b>Pknx1</b>         | 0.408085019 | 6.961196673 | 5.267160404 | 0.000419517 | 0.047608333 | 0.367633523 |
| ILMN_2838372 | <b>2010111I01Rik</b> | 0.560150022 | 7.976222684 | 5.313921987 | 0.000393162 | 0.045361117 | 0.431571586 |
| ILMN_2426965 | <b>Tpm3</b>          | 0.865956302 | 8.671598109 | 5.340772854 | 0.000378838 | 0.044449215 | 0.468128834 |
| ILMN_2604224 | <b>Sema5a</b>        | 0.418780647 | 6.504126226 | 5.351395281 | 0.000373326 | 0.044176952 | 0.482559673 |
| ILMN_3009225 | <b>Apoc4</b>         | 1.741132414 | 5.806519409 | 5.364176726 | 0.000366809 | 0.043779898 | 0.499899917 |
| ILMN_3074610 | <b>C730004C24Rik</b> | 0.98603833  | 5.135629557 | 5.421293098 | 0.000339142 | 0.041358534 | 0.577072245 |
| ILMN_2973089 | <b>Coq3</b>          | 0.450959924 | 7.474659009 | 5.450362445 | 0.000325931 | 0.040290262 | 0.616150896 |
| ILMN_2697749 | <b>Glyat</b>         | 0.85041007  | 6.382990606 | 5.469734755 | 0.000317434 | 0.039772059 | 0.642119399 |
| ILMN_1242984 | <b>LOC245683</b>     | 0.598324881 | 7.452203619 | 5.481843266 | 0.000312245 | 0.039660802 | 0.658320692 |
| ILMN_1214634 | <b>Aqp9</b>          | 0.840557164 | 5.139415259 | 5.483947966 | 0.000311352 | 0.039660802 | 0.661134436 |
| ILMN_2592266 | <b>2310009N05Rik</b> | 0.497823605 | 10.14074002 | 5.493980818 | 0.000307134 | 0.039660802 | 0.674537597 |
| ILMN_2937735 | <b>Irak2</b>         | 0.561623782 | 7.834088595 | 5.515557299 | 0.000298271 | 0.039022712 | 0.703308362 |
| ILMN_2710274 | <b>Slc9a3r2</b>      | 0.449430221 | 10.17514769 | 5.531951054 | 0.00029172  | 0.038835227 | 0.725119193 |
| ILMN_2832105 | <b>Fgg</b>           | 1.586463246 | 6.648757379 | 5.535908216 | 0.000290162 | 0.038835227 | 0.730377588 |
| ILMN_2654700 | <b>Drp2</b>          | 0.649022105 | 6.284021226 | 5.566583675 | 0.000278385 | 0.037786705 | 0.7710563   |
| ILMN_2797973 | <b>Pgk1</b>          | 0.487710438 | 5.767358592 | 5.57168359  | 0.000276478 | 0.037786705 | 0.777804917 |
| ILMN_2660837 | <b>Siat7d</b>        | 0.624994585 | 7.048523076 | 5.589017564 | 0.000270099 | 0.037772886 | 0.800711995 |
| ILMN_2635871 | <b>3110057O12Rik</b> | 0.704887777 | 7.176053729 | 5.592814968 | 0.000268722 | 0.037772886 | 0.805723996 |
| ILMN_1243507 | <b>Ssb4</b>          | 0.803992506 | 5.794849565 | 5.71908927  | 0.000227001 | 0.033434385 | 0.971096477 |
| ILMN_1225835 | <b>Mfap5</b>         | 0.564727121 | 9.04575175  | 5.725564246 | 0.000225059 | 0.033434385 | 0.979508888 |
| ILMN_2806065 | <b>Ankrd2</b>        | 0.958794958 | 11.54685999 | 5.763891499 | 0.000213924 | 0.032193238 | 1.029170093 |
| ILMN_2691059 | <b>Cyp2c37</b>       | 1.413709263 | 5.727364734 | 5.785113088 | 0.000208015 | 0.031648044 | 1.056568519 |
| ILMN_1247071 | <b>Slc22a1</b>       | 0.683502696 | 5.188619269 | 5.785720724 | 0.000207849 | 0.031648044 | 1.05735198  |
| ILMN_2907540 | <b>Lmcd1</b>         | 0.529719773 | 12.74069909 | 5.865883845 | 0.000187086 | 0.029630651 | 1.160206937 |
| ILMN_2655555 | <b>Taf9</b>          | 0.544171166 | 5.095932542 | 5.876458617 | 0.000184519 | 0.029630651 | 1.173700532 |
| ILMN_3127335 | <b>Syt12</b>         | 0.937081321 | 8.288181434 | 5.950815547 | 0.000167506 | 0.027680702 | 1.268092121 |
| ILMN_1225699 | <b>Serpina1a</b>     | 0.937753743 | 5.146544911 | 5.953045476 | 0.000167022 | 0.027680702 | 1.270909677 |
| ILMN_1219231 | <b>Akap1</b>         | 0.485741131 | 9.298170107 | 5.960431248 | 0.000165432 | 0.027680702 | 1.280236254 |
| ILMN_2732401 | <b>C130068O12Rik</b> | 0.449211146 | 13.30461459 | 6.118648723 | 0.000135016 | 0.023965408 | 1.478016108 |
| ILMN_2696171 | <b>D830014E11Rik</b> | 0.848716145 | 6.348573611 | 6.121222626 | 0.000134575 | 0.023965408 | 1.48120195  |
| ILMN_2728473 | <b>Serpina3m</b>     | 0.683309941 | 5.519770414 | 6.141890146 | 0.000131083 | 0.023965408 | 1.50674654  |
| ILMN_2770386 | <b>Fhl2</b>          | 0.638539351 | 5.249988058 | 6.20361382  | 0.000121226 | 0.022680766 | 1.582649266 |
| ILMN_2828768 | <b>Usp28</b>         | 0.468918176 | 9.518707654 | 6.218821891 | 0.000118923 | 0.022554584 | 1.601262268 |
| ILMN_1225873 | <b>Slc1a1</b>        | 1.001269515 | 7.719435452 | 6.240886222 | 0.000115664 | 0.022241314 | 1.628204448 |
| ILMN_1228469 | <b>Apoc1</b>         | 2.045885967 | 7.560372253 | 6.275358535 | 0.000110766 | 0.021599321 | 1.670150771 |



|              |                      |             |             |             |          |             |             |
|--------------|----------------------|-------------|-------------|-------------|----------|-------------|-------------|
| ILMN_2955818 | <b>Ugt2b36</b>       | 1.853024782 | 5.923882464 | 6.383368051 | 9.68E-05 | 0.020006308 | 1.800423674 |
| ILMN_2734924 | <b>1190003J15Rik</b> | 1.101645067 | 5.981411405 | 6.448128988 | 8.94E-05 | 0.018748148 | 1.877699569 |
| ILMN_2789650 | <b>Csrp3</b>         | 1.183661329 | 11.28958598 | 6.466806573 | 8.73E-05 | 0.018604273 | 1.899871145 |
| ILMN_2753029 | <b>Gch1</b>          | 0.650253979 | 6.127088124 | 6.567356461 | 7.72E-05 | 0.017248636 | 2.018348291 |
| ILMN_2774563 | <b>Mug1</b>          | 1.368534844 | 5.33041277  | 6.683493626 | 6.71E-05 | 0.015751412 | 2.153354321 |
| ILMN_2613038 | <b>1110033I14Rik</b> | 1.085508191 | 12.45057323 | 6.797541924 | 5.86E-05 | 0.013981816 | 2.284037762 |
| ILMN_1259180 | <b>Dscr1</b>         | 1.094526735 | 8.3697549   | 6.847529884 | 5.52E-05 | 0.0134089   | 2.340731386 |
| ILMN_1245514 | <b>Cyp2c70</b>       | 1.654420375 | 5.604496221 | 6.851668477 | 5.49E-05 | 0.0134089   | 2.345409256 |
| ILMN_2657822 | <b>Stat2</b>         | 0.730806756 | 5.240634131 | 6.858335948 | 5.45E-05 | 0.0134089   | 2.352940427 |
| ILMN_1247811 | <b>Ass1</b>          | 0.781026835 | 7.251030268 | 6.877631597 | 5.33E-05 | 0.0134089   | 2.374700197 |
| ILMN_1255164 | <b>Slco1b2</b>       | 2.408492256 | 6.418395089 | 6.880954456 | 5.31E-05 | 0.0134089   | 2.378442086 |
| ILMN_2742068 | <b>Csrp3</b>         | 1.160151851 | 11.36891643 | 6.889526975 | 5.25E-05 | 0.0134089   | 2.388088453 |
| ILMN_2589871 | <b>Cd28</b>          | 0.857021794 | 5.750423038 | 6.913433089 | 5.11E-05 | 0.0134089   | 2.414934495 |
| ILMN_1247343 | <b>Lmcd1</b>         | 0.616618276 | 11.93803288 | 6.919977791 | 5.07E-05 | 0.0134089   | 2.422270031 |
| ILMN_1234072 | <b>Pdlim1</b>        | 0.782707772 | 11.50957436 | 7.013875362 | 4.54E-05 | 0.012835171 | 2.526853532 |
| ILMN_2752524 | <b>Paqr9</b>         | 0.881075506 | 7.040472056 | 7.040343643 | 4.41E-05 | 0.012835171 | 2.556112093 |
| ILMN_2704749 | <b>Es1</b>           | 1.054352193 | 5.812338994 | 7.123202959 | 4.00E-05 | 0.012596914 | 2.64708051  |
| ILMN_1231765 | <b>Cmya1</b>         | 0.843627567 | 10.16868429 | 7.371552326 | 3.02E-05 | 0.009954142 | 2.914133914 |
| ILMN_2916705 | <b>Tuba1a</b>        | 0.613987952 | 8.810120645 | 7.428113355 | 2.83E-05 | 0.009811187 | 2.973799288 |
| ILMN_2847061 | <b>Slc27a5</b>       | 0.812643276 | 5.039893743 | 7.51408854  | 2.58E-05 | 0.009387115 | 3.063685731 |
| ILMN_2830333 | <b>Hpxn</b>          | 1.105954661 | 5.558612461 | 7.529350041 | 2.53E-05 | 0.009387115 | 3.079540408 |
| ILMN_1213817 | <b>Mup3</b>          | 2.796324379 | 10.1177268  | 7.534169575 | 2.52E-05 | 0.009387115 | 3.084540961 |
| ILMN_2952275 | <b>Arg1</b>          | 2.123449516 | 5.977537015 | 7.566788302 | 2.43E-05 | 0.009387115 | 3.118305456 |
| ILMN_2788223 | <b>Kng1</b>          | 1.846166328 | 7.794218267 | 7.610715319 | 2.32E-05 | 0.009387115 | 3.163557694 |
| ILMN_2599794 | <b>Apoc1</b>         | 1.785353866 | 8.606037905 | 7.682349623 | 2.14E-05 | 0.008987802 | 3.236820465 |
| ILMN_3159131 | <b>Cyp2a5</b>        | 1.767174907 | 6.098027092 | 7.763288413 | 1.96E-05 | 0.008490419 | 3.318811525 |
| ILMN_2993745 | <b>Ahsg</b>          | 2.430013306 | 6.330040444 | 7.84604385  | 1.80E-05 | 0.008018286 | 3.40178775  |
| ILMN_3133352 | <b>Ung</b>           | 0.67859964  | 9.685683581 | 8.202872819 | 1.23E-05 | 0.00573454  | 3.749896549 |
| ILMN_2840533 | <b>Aldob</b>         | 1.492942539 | 5.58047853  | 8.244035893 | 1.18E-05 | 0.00573454  | 3.789065404 |
| ILMN_2645815 | <b>Cyp2a12</b>       | 0.883215487 | 5.201710906 | 8.709923684 | 7.39E-06 | 0.003933361 | 4.218689512 |
| ILMN_2789651 | <b>Csrp3</b>         | 1.290126546 | 9.416025633 | 8.836374125 | 6.52E-06 | 0.003613195 | 4.331082385 |
| ILMN_1236304 | <b>Hamp</b>          | 2.553088467 | 6.242150275 | 8.95166173  | 5.83E-06 | 0.003365188 | 4.432036711 |
| ILMN_2602185 | <b>40795</b>         | 0.765137244 | 5.810790625 | 8.999171227 | 5.57E-06 | 0.00335434  | 4.473224342 |
| ILMN_2788221 | <b>Kng1</b>          | 1.572570744 | 5.850510617 | 9.43980163  | 3.68E-06 | 0.002314376 | 4.844000915 |
| ILMN_2980371 | <b>Es1</b>           | 1.897095548 | 5.701402114 | 9.480549614 | 3.54E-06 | 0.002314376 | 4.877291163 |
| ILMN_1247156 | <b>Apoa2</b>         | 3.481417885 | 9.463187033 | 9.555139963 | 3.31E-06 | 0.002289433 | 4.937803731 |
| ILMN_2837080 | <b>Azgp1</b>         | 2.677402425 | 6.973847797 | 9.694849363 | 2.91E-06 | 0.002122158 | 5.049679882 |

|              |                  |             |             |             |          |             |             |
|--------------|------------------|-------------|-------------|-------------|----------|-------------|-------------|
| ILMN_1235719 | <b>LOC231396</b> | 2.587061718 | 6.354844262 | 9.73824757  | 2.80E-06 | 0.002122158 | 5.084048039 |
| ILMN_2718431 | <b>Itih4</b>     | 1.49688907  | 5.725354034 | 9.954857314 | 2.31E-06 | 0.001879507 | 5.252915572 |
| ILMN_2764036 | <b>Ahsg</b>      | 2.531040376 | 6.093317727 | 9.994000668 | 2.23E-06 | 0.001879507 | 5.282963367 |
| ILMN_2904137 | <b>Ambp</b>      | 2.784319379 | 6.884209999 | 10.2238133  | 1.82E-06 | 0.001683418 | 5.45655142  |
| ILMN_1232567 | <b>Fga</b>       | 2.697542634 | 6.452350414 | 11.00730477 | 9.46E-07 | 0.00093527  | 6.01383795  |
| ILMN_2644185 | <b>Apof</b>      | 1.292275019 | 5.584615195 | 11.01243614 | 9.42E-07 | 0.00093527  | 6.017320168 |
| ILMN_2678460 | <b>Mat1a</b>     | 2.375178305 | 6.493208917 | 11.39133128 | 6.96E-07 | 0.000802485 | 6.268739707 |
| ILMN_2443330 | <b>Ttr</b>       | 2.964318941 | 8.471966781 | 11.55506845 | 6.12E-07 | 0.000770051 | 6.373994189 |
| ILMN_1220234 | <b>Serpina1e</b> | 3.593539271 | 7.10418024  | 12.72452138 | 2.56E-07 | 0.000354148 | 7.070693479 |
| ILMN_1225570 | <b>Serpina1d</b> | 3.922791543 | 7.824788714 | 12.84934757 | 2.34E-07 | 0.000354148 | 7.139724057 |
| ILMN_2659680 | <b>Serpina1b</b> | 3.761521553 | 8.190775075 | 12.93341894 | 2.21E-07 | 0.000354148 | 7.185672618 |
| ILMN_1215859 | <b>Serpina1b</b> | 4.190034574 | 7.774562696 | 13.03215526 | 2.06E-07 | 0.000354148 | 7.239084781 |
| ILMN_3004600 | <b>Serpina1c</b> | 3.842734479 | 7.217742062 | 13.07243128 | 2.00E-07 | 0.000354148 | 7.260703081 |
| ILMN_2744565 | <b>Hpxn</b>      | 2.956554723 | 6.605820876 | 13.20790998 | 1.82E-07 | 0.000354148 | 7.332710518 |
| ILMN_2624363 | <b>Fga</b>       | 2.922938932 | 6.539895689 | 13.30342043 | 1.71E-07 | 0.000354148 | 7.38282369  |
| ILMN_2623393 | <b>Apoa1</b>     | 3.689650158 | 7.3051642   | 13.63416558 | 1.36E-07 | 0.000354148 | 7.552305039 |
| ILMN_2651539 | <b>Apoc3</b>     | 3.046626036 | 6.576112981 | 14.93852279 | 5.88E-08 | 0.000354148 | 8.163806332 |

**table S5. Primer sequences for qPCR analyses on tissues and for genotyping of Control f/f and MERKO mice.**

| <b>Q-PCR</b>                     |                             |                         |                           |
|----------------------------------|-----------------------------|-------------------------|---------------------------|
| GeneSymbol                       | NCBI Ref.Seq                | Forward                 | Reverse                   |
| <i>Acaca</i>                     | NM_133360                   | CTGAAGCAGATCCGCAGCTT    | GGTGAGATGTGCTGGGTCATG     |
| <i>Acacb</i>                     | NM_133904                   | CATACACAGAGCTGGTGTGGACT | CACCATGCCACCTCGTTAC       |
| <i>Acadm</i>                     | NM_007382                   | GCAGCCAATGATGTGTGCTTAC  | CACCCTTCTTCTCTGCTTTGGT    |
| <i>Acox1</i>                     | NM_015729                   | GCCCAACTGTGACTTCCAT     | GGCATGTAACCCGTAGCACT      |
| <i>Atg12</i>                     | NM_026217                   | CCACAGCCCATTCTTTTGT     | GAAACAGCCACCCCAGAG        |
| <i>Atg4b</i>                     | NM_174874                   | TCCGACAGGGAAGATGGAC     | AAATGCTGATTTTTCTGCCCA     |
| <i>Atg5</i>                      | NM_053069                   | ACAGCTTCTGGATGAAAGGC    | TGGGACTGCAGAATGACAGA      |
| <i>Atp5A1</i>                    | NM_007505                   | TCTCCATGCCTCTAACACTCG   | CCAGGTCAACAGACGTGTCAG     |
| <i>Cd36</i>                      | NM_007643                   | TCCAGCCAATGCCTTTGC      | TGGAGATTACTTTTTCACTGCAGAA |
| <i>Cox7a1</i>                    | NM_009944                   | CTCTTCCAGGCCGCAATGA     | CCCAGCCCCAAGCAGTATAAGC    |
| <i>Cpt1b</i>                     | NM_009948                   | CTCCTGGAAGAAACGCCTTATT  | CACCTTGCAGTAGTTGGAACC     |
| <i>Cyc1</i>                      | NM_025567                   | TGGCTCCTCCATCTACACAG    | CGATGGTCATGCTCTGGTTCT     |
| <i>Cycs</i>                      | NM_007808                   | CCAAATCTCCACGGTCTGTTT   | ATCAGGGTATCCTCTCCCCAG     |
| <i>Err1</i>                      | NM_007953                   | GGAGGACGGCAGAGTACAAA    | GCGACACCAGAGCGTTTAC       |
| <i>Errg</i>                      | NM_011935                   | TTGTACTTCTGCCGACCTCC    | TGAGATCACAAGCGCAGAC       |
| <i>Esr1(ex4-5)</i>               | NM_007956                   | GCTACTGTGCCGTGTGCAA     | TGTCAATGGTGCATTGGTTTG     |
| <i>Esr1 (ex 3)</i>               | NM_007956                   | GCCAGAATGGCCGAGAGAG     | CCCCATAATGGTAGCCAGAGG     |
| <i>Esr2</i>                      | NM_010157                   | GCCAACCTCCTGATGCTTCT    | TCGTACACCGGGACCACAT       |
| <i>Fasn</i>                      | NM_007988                   | TGCTCCCAGCTGCAGGC       | GCCCCGGTAGCTCTGGGTGTA     |
| <i>Fbxo32</i>                    | NM_026346                   | TCAGGGATGTGAGCTGTGAC    | AAGGAGCGCCATGGATACT       |
| <i>Gata1</i>                     | <a href="#">NM_008089.1</a> | AGGGCAGAATCCACAAACTG    | AGGGCAGAATCCACAAACTG      |
| <i>Gata3</i>                     | <a href="#">NM_008091.3</a> | GCCTGCGGACTCTACCATAA    | CATTAGCGTTCTCCTCCAG       |
| <i>Gper</i>                      | NM_029771                   | CCAAGCCTCAACACTCACACA   | CCTGGGAGCCTGTTAGTCTCA     |
| <i>Gpx3</i>                      | NM_008161                   | GATGGTGAGGGCTCCATACT    | CATCCTGCCTTCTGTCCCT       |
| <i>Lmcd1</i>                     | NM_144799                   | ATGGCAAAAGTGGCTAAGGA    | TTGCATATTTTCTCCACGA       |
| <i>Map1lc3b</i>                  | NM_026160                   | AATCACTGGGATCTTGGTGG    | AGTCAGATCGTCTGGCTCG       |
| <i>Mef2c</i>                     | NM_025282                   | GCCGGACAAACTCAGACATTG   | GGGTTTCCCAGTGTGCTGAC      |
| <i>mt-Co3</i>                    | NC_005089                   | GCAGGATTCTTCTGAGCGTTCT  | GTCAGCAGCCTCCTAGATCATGT   |
| <i>Ndufs1</i>                    | NM_145518                   | CACTCGTTCACCTCAGCTA     | GACGGCTCCTCTACTGCCT       |
| <i>Nrf1</i>                      | NM_010938                   | GAACTGCCAACCCACAGTCAC   | CGTCTGGATGGTCATTTTAC      |
| <i>Park7</i>                     | NM_020569                   | AACACACCCACTGGCTAAGG    | GTGCCTCCACAATGGCTAGT      |
| <i>Pik3c3</i>                    | NM_181414                   | GTTTCAGCTTCATCGGAGGAG   | ATTCTTGGAGTTGGAGACCG      |
| <i>Polg1</i>                     | NM_017462                   | TAGCTGGCTGGTCCAAGAGT    | CGACGTGGAGGTCTGCTT        |
| <i>Ppard</i>                     | NM_011145                   | GCCTCGGGCTTCCACTAC      | AGATCCGATCGCACTTCTCA      |
| <i>Pparg</i>                     | NM_011146                   | GCCCTTTGGTGACTTTATGG    | CAGCAGGTTGTCTTGGATGT      |
| <i>Ppargc1</i>                   | NM_008904                   | TGAGGACCGCTAGCAAGTTT    | TGAAGTGGTGTAGCGACCAA      |
| <i>Ppargc1b</i>                  | NM_133249                   | CTGAGTCAAAGTCACTGGCG    | GCTCTCGTCTTCTTCTCA        |
| <i>Ppia</i>                      | NM_008907                   | AGCCAAATCCTTTCTCTCCAG   | CACCGTGTCTTCTCGACATCA     |
| <i>Sdha</i>                      | NM_023281                   | TACTACAGCCCCAAGTCT      | TGGACCCATCTTCTATGC        |
| <i>SLC2a4</i>                    | NM_009204                   | CCCCCGATACCCTTACATCATC  | GCATCAGACACATCAGCCCCAG    |
| <i>Sqstm1</i>                    | NM_011018                   | TTTCTGGGGTAGTGGGTGTC    | CTGAAGAATGTGGGGGAGAG      |
| <i>Tfam</i>                      | NM_009360                   | AGCTTGTAATGAGGCTTGGA    | AGATGTCTCCGGATCGTTTC      |
| <i>Ulk1</i>                      | NM_009469                   | TAGTCAGCCAGGTCTCCACC    | CTGCTGGGAAAGGAAATCAA      |
| <i>Ulk2</i>                      | NM_013881                   | TAATCTGCCAGGTCTCCACC    | CAAATTCTGCTTGGAAAGGAA     |
| <b>Mitochondrial Mutations</b>   |                             |                         |                           |
| <i>Mt-copy</i>                   |                             | CCTATCACCCTTGCCATCAT    | GAGGCTGTTGCTTGTGTGAC      |
| <i>Mt-flanking TaqI 634 site</i> |                             | ACTCAAAGGACTTGGCGGTA    | AGCCCCATTTCTCCCATTTT      |

| <b>Genotyping</b>                                                  |                                                     |                                                          |
|--------------------------------------------------------------------|-----------------------------------------------------|----------------------------------------------------------|
| <i>Floxed ER<math>\alpha</math> Exon 3</i><br><i>CRE transgene</i> | GACTCGCTACTGTGCCGTGTGC<br>GCATTACCGGTCGTAGCAACGAGTG | CTTCCCTGGCATTACCACTTCTCCT<br>GAACGCTAGAGCCTGTTTTGCACGTTT |

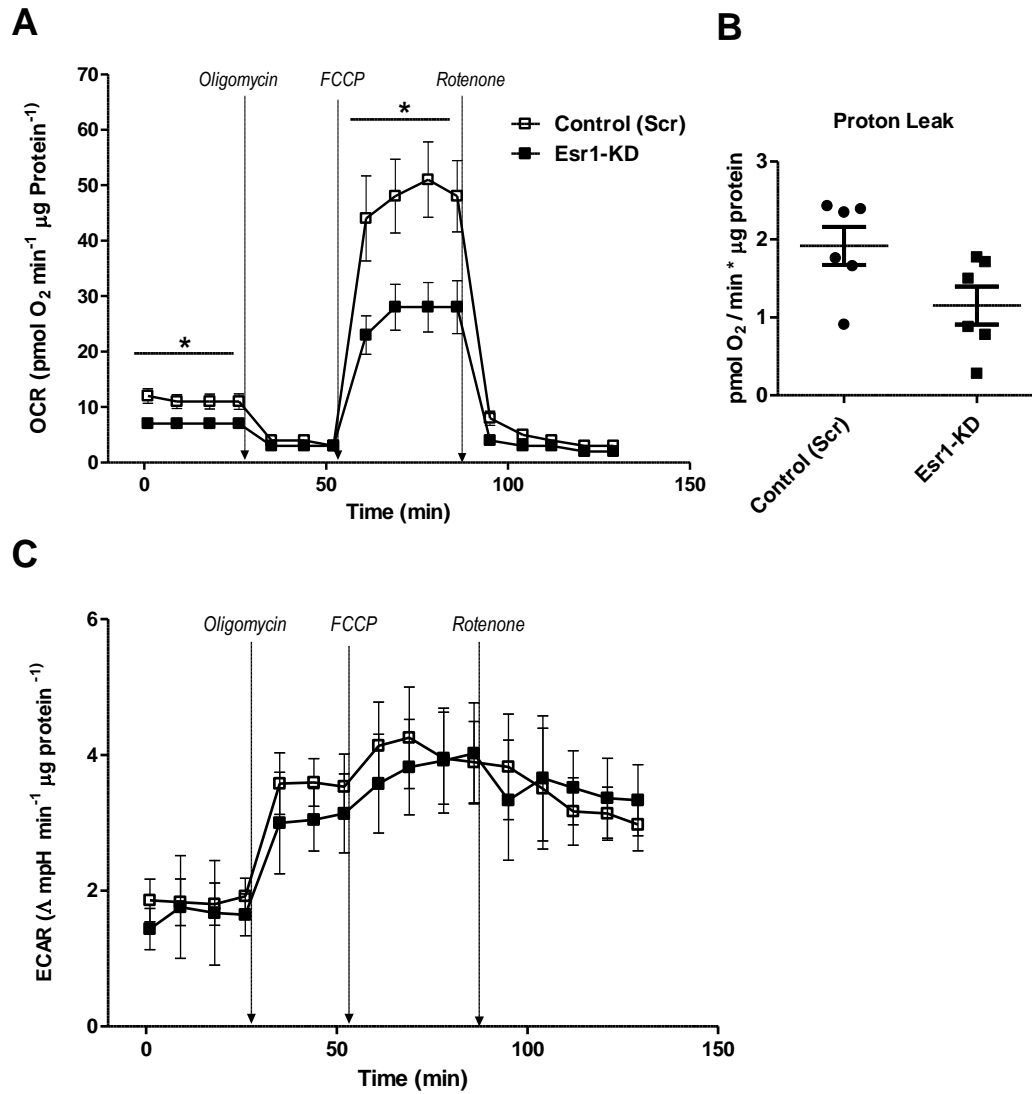

**fig. S1.** Real-time respirometry in C2C12 myotubes. (A) Traces of cellular oxygen consumption (OCR), (B) proton leak, and (C) extracellular acidification rate (ECAR) in Control (Scr) and Esr1-KD myotubes ( $n=6/\text{genotype}$ ). Values are expressed as mean  $\pm$  SEM and differences between genotypes were detected by Student's t-test and repeated measures ANOVA where appropriate, \*  $P<0.05$ .

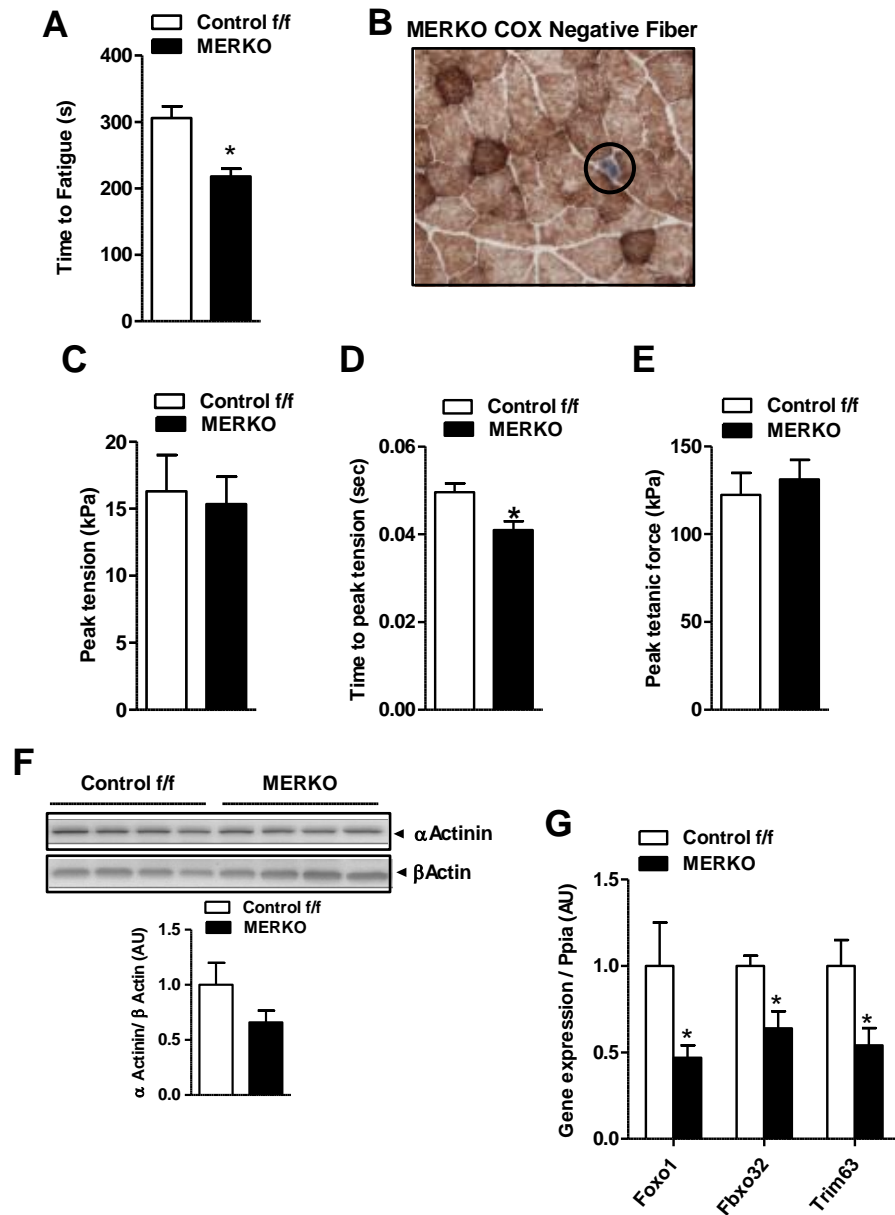

**fig. S2. Muscle peak tension and time to fatigue.** Solues muscle fiber (A) time to fatigue (B) cytochrome oxidase (COX) negative fibers identified only in MERKO muscle (n=5 positive of 6 MERKO mice observed), (C) peak tension, (D) time to peak tension, (E) peak tetanic force, (F)  $\alpha$  Actinin protein abundance detected by immunoblotting, and (G) atrogenes expression assessed by qPCR. All studies performed in muscle from female Control *f/f* (open bars) versus MERKO (closed bars) n=6 per genotype. Values are expressed as mean  $\pm$  SEM and differences between groups were detected by Student's t-test, \*  $p < 0.05$ .

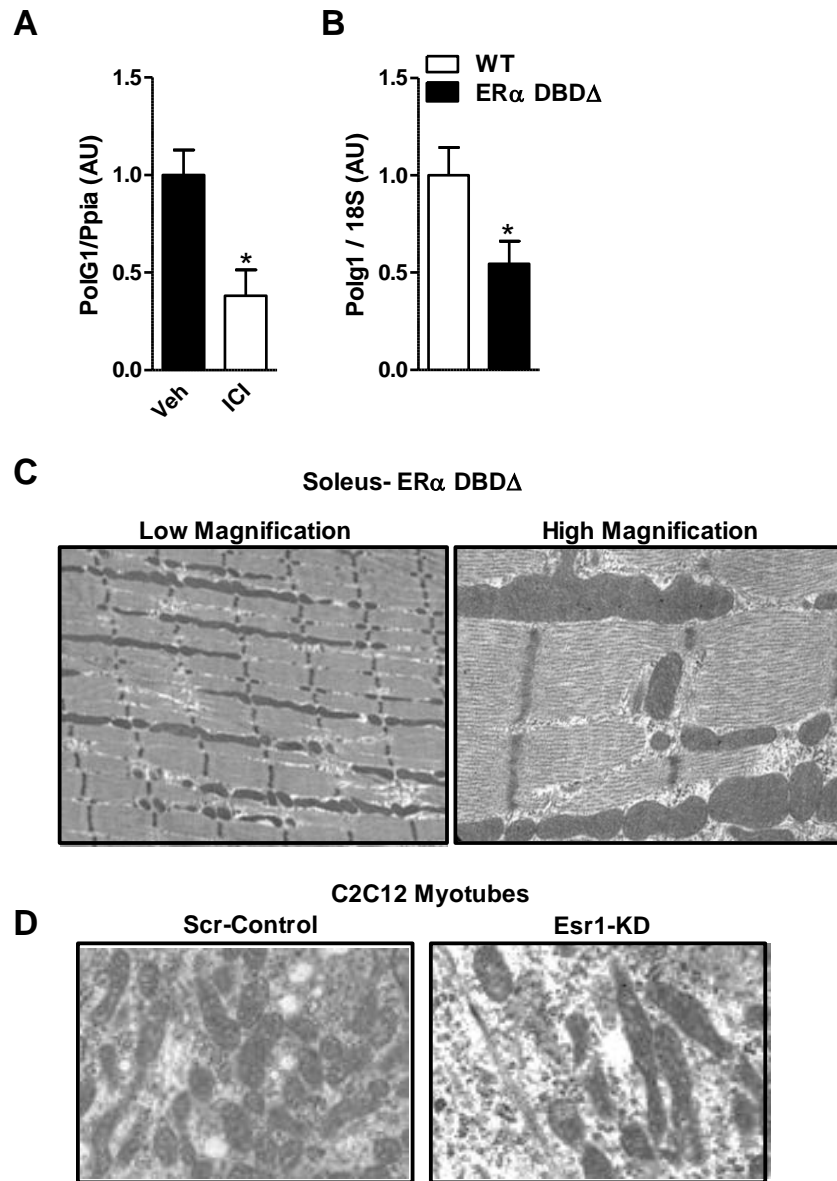

**fig. S3. Polg1 expression is regulated by ER $\alpha$  in muscle.** Polg1 expression levels were assessed in **(A)** C2C12 myotubes treated with ICI (1 $\mu$ M) for 24h and in **(B)** quadriceps muscle from ER $\alpha$  DBD $\Delta$  mice by qRT-PCR (normalized to Ppia). **(C)** Representative low and high magnification electron micrographs of soleus muscle from ER $\alpha$  DBD $\Delta$  mice. **(D)** Transmission electron microscopy of C2C12 myocytes shows elongated and fused mitochondria in Esr1-KD versus Control (Scr), morphology changes similar to that observed in MERKO versus Control f/f mouse muscle. Values are expressed as mean  $\pm$  SEM and differences between groups were detected by one-way ANOVA, \*  $P < 0.05$  compared to vehicle control.

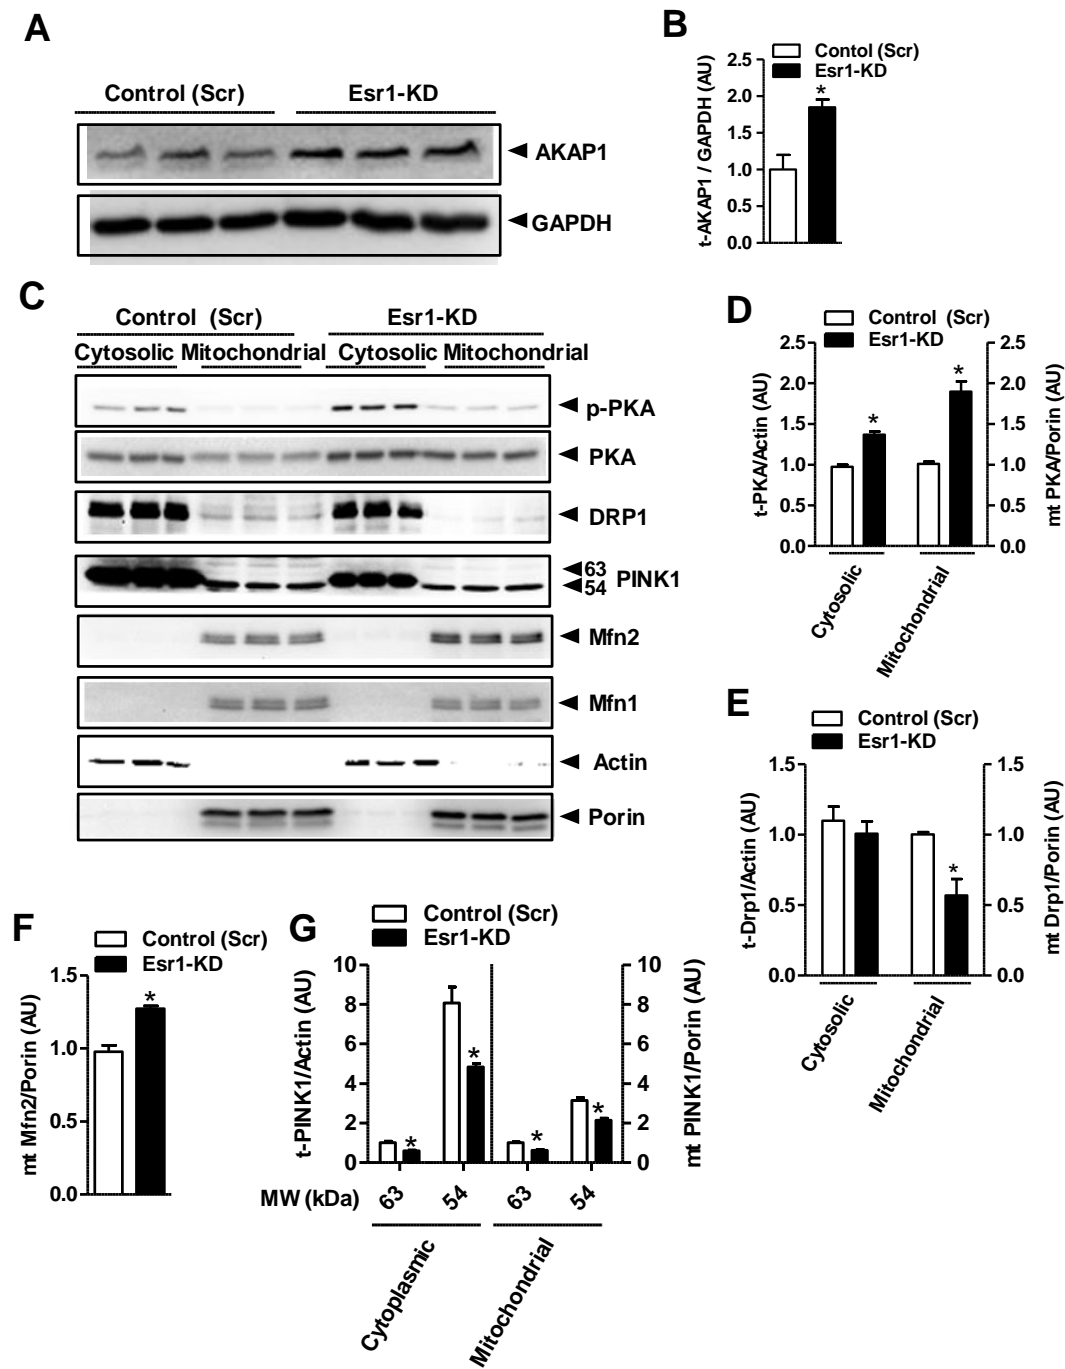

**fig. S4. Altered mitochondrial fission-fusion signaling in ER $\alpha$ -deficient C2C12 myotubes.** (A) AKAP 1 protein abundance in Control (Scr) (open bars) and Esr1-KD (closed bars) myotubes as detected by immunoblotting and (B) densitometric analysis,  $n=6$  / condition. (C) Protein abundance of (D) PKA, (E) DRP1, (F) Mfn1/2, and (G) PINK1 in Control (Scr) and Esr1-KD myotubes as detected by immunoblotting and densitometric analysis,  $n=6$  / condition. Values are expressed as mean  $\pm$  SEM and differences between groups were detected by Student's t-test and one-way ANOVA where appropriate, \*  $P<0.05$ .



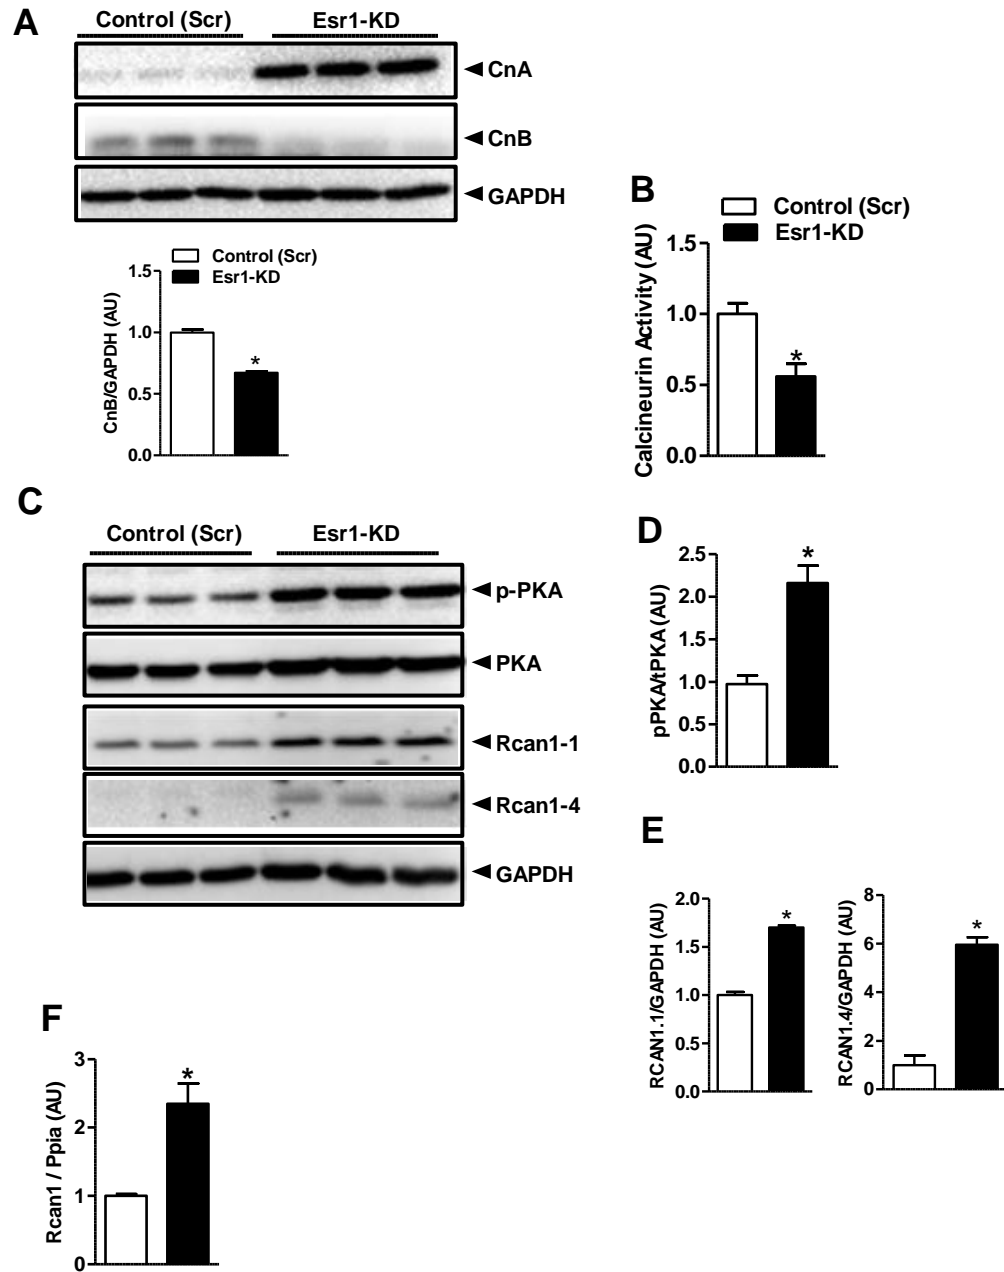

**fig. S5. Calcineurin-PKA-Rcan1 axis in C2C12 myotubes with Esr1-KD.** (A) Calcineurin subunit protein level and (B) enzymatic activity in Control (Scr) and Esr1-KD C2C12 myotubes. (C-E) Representative immunoblots (n=3) and corresponding densitometry (n=6) of total and phosphorylated PKA and Rcan1 (1-1, 38 kDa and 1-4, 26 kDa) normalized to GAPDH. (F) Rcan1 expression levels in Control (Scr) and Esr1-KD C2C12 myotubes normalized to Ppia (n=6/genotype). Values are expressed as mean  $\pm$  SEM, and differences between groups were detected by Student's t-test, \*  $P < 0.05$ .

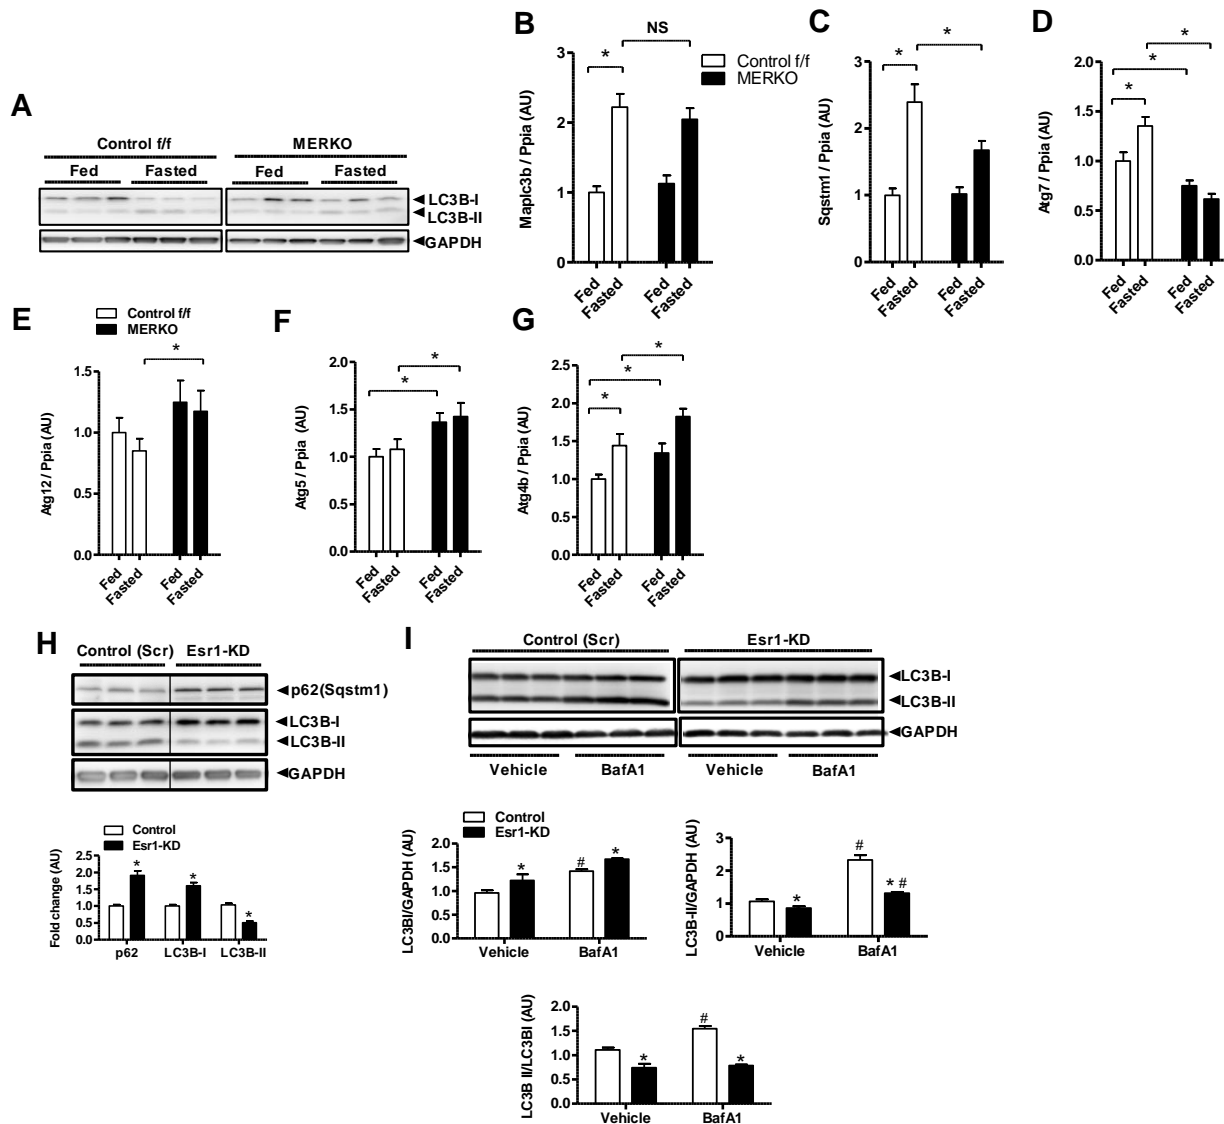

**fig. S6. Expression of autophagy-related genes in MERKO muscle.** (A) Representative immunoblots of LC3BI and II protein in muscle from fed and fasted (24h) Control f/f vs. MERKO mice ( $n=6$  mice per condition). (B-G) Quantitative RT-PCR analyses of critical autophagic effectors in muscle from fed and fasted Control f/f and MERKO mice,  $n=6$  mice/condition. (B) Maplc3b Atg7, (C) Sqstm1/p62, (D) Atg7, (E) Atg12, (F) Atg5, and (G) Atg4b muscle expression levels at basal and following fasting (24-h) in female Control f/f vs. MERKO mice ( $n=6$  mice/condition). (H-I) p62 and LC3BI and II protein levels in Control (Scr) and Esr1-KD myotubes at basal and following bafilomycin A<sub>1</sub> (BafA<sub>1</sub>, 25nM) treatment ( $n=3-6$ /condition). Values are expressed as mean  $\pm$  SEM and differences between groups were detected by Student's *t* test one-way ANOVA. \* $P<0.05$  difference between genotypes. #  $P<0.05$  within group, between treatment difference.

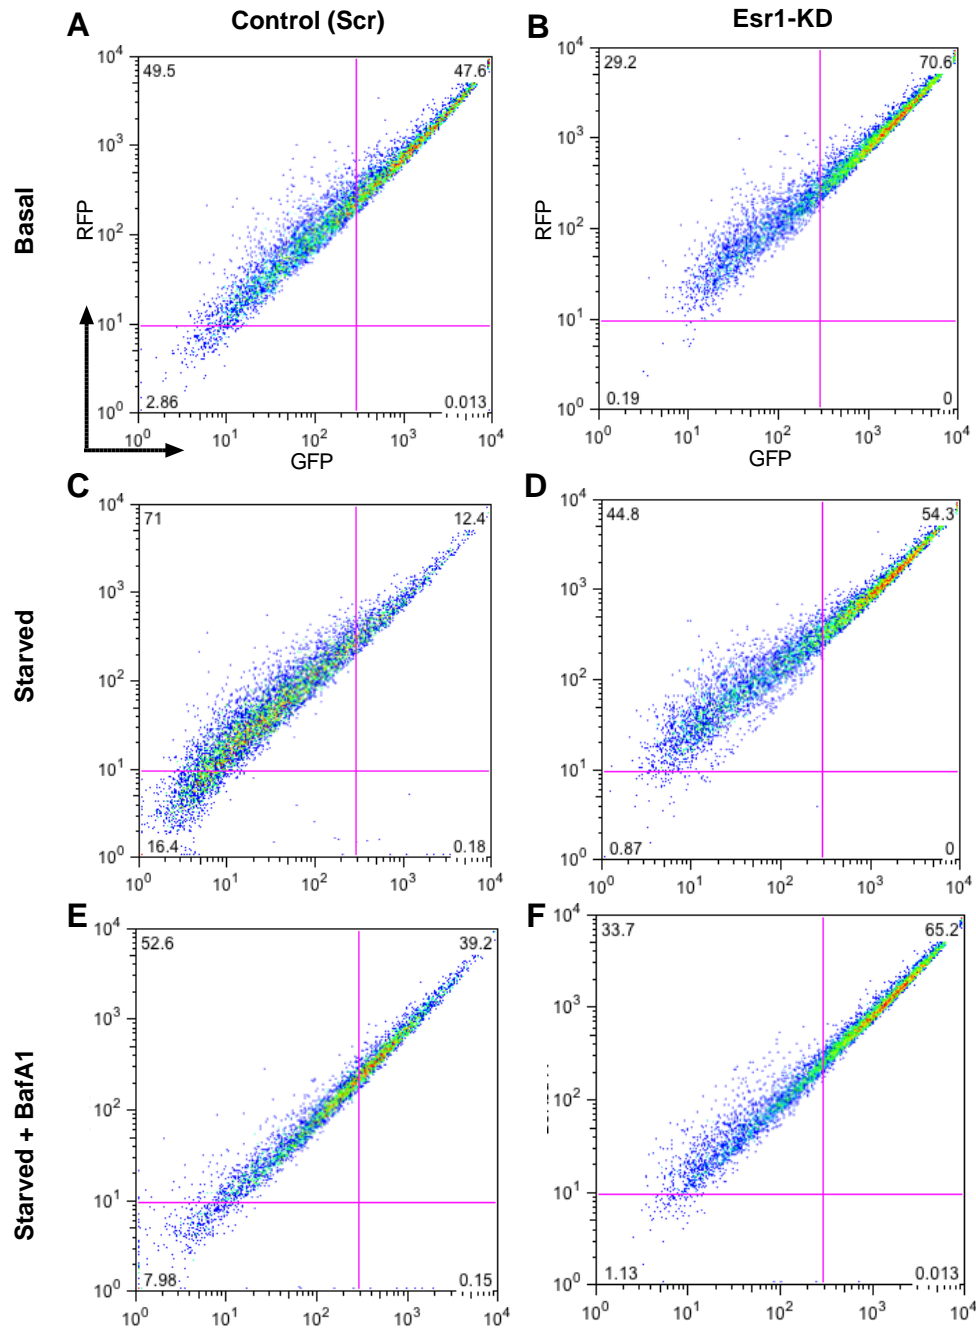

**fig. S7. Autophagic flux studies in C2C12 myocytes with Esr1-KD.** Flow cytometry analyses were performed on myocytes infected with tandem labeled Gfp-Rfp-Lc3b and exposed to nutrient deprivation (starvation) in the presence or absence of BafA<sub>1</sub>. Representative FACS plots depicting autophagic flux in Scr-Control and Esr1-KD C2C12 myocytes under basal conditions (**A-B**), and following 4-hour nutrient deprivation (starvation) without (**C-D**) or with 4-hour BafA<sub>1</sub> treatment (**E-F**). Gates defining GFP-RFP double-positive and RFP single-positive cells show reduced autophagosome turnover (loss of GFP-RFP signal) and autolysosome formation (RFP single-positive signal) at basal and following starvation in Esr1-KD myocytes. Values presented in the far corners of quadrants indicate percent cells in each quadrant. Studies were performed in triplicate.
